# Supplementary material
Source: publisher figshare collection journal article supplement (https://acs.figshare.com/ndownloader/files/4402411)
Supplement: Supplementary file 1 [file 4402411]

## SUPPORTING INFORMATION

**Reactivity of  $[\text{Au}_{25}(\text{SCH}_2\text{CH}_2\text{Ph})_{18}]^-$  Nanoparticles with Metal Ions**

Jai-Pil Choi,<sup>†</sup> Christina A. Fields-Zinna, Rebecca L. Stiles,<sup>‡</sup> Ramjee Balasubramanian,<sup>§</sup> Alicia D. Douglas,<sup>#</sup> Matthew C. Crowe, and Royce W. Murray\*

*Kenan Laboratories of Chemistry, University of North Carolina, Chapel Hill, North Carolina 27599-3290*

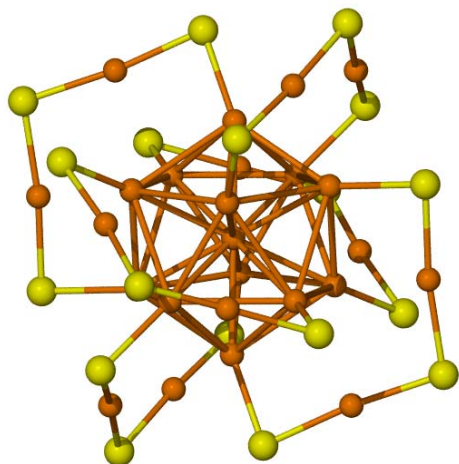

**Figure S-1.** Crystal structure of  $\text{Au}_{25}(\text{SCH}_2\text{CH}_2\text{Ph})_{18}$ , where smaller orange balls are Au atoms, and larger yellow balls are sulfur atoms (the rest of ligand,  $-\text{CH}_2\text{CH}_2\text{Ph}$ , is not pictured). Image emphasizes the  $\text{Au}_2\text{L}_3$  semi-rings. From Ref. 9.

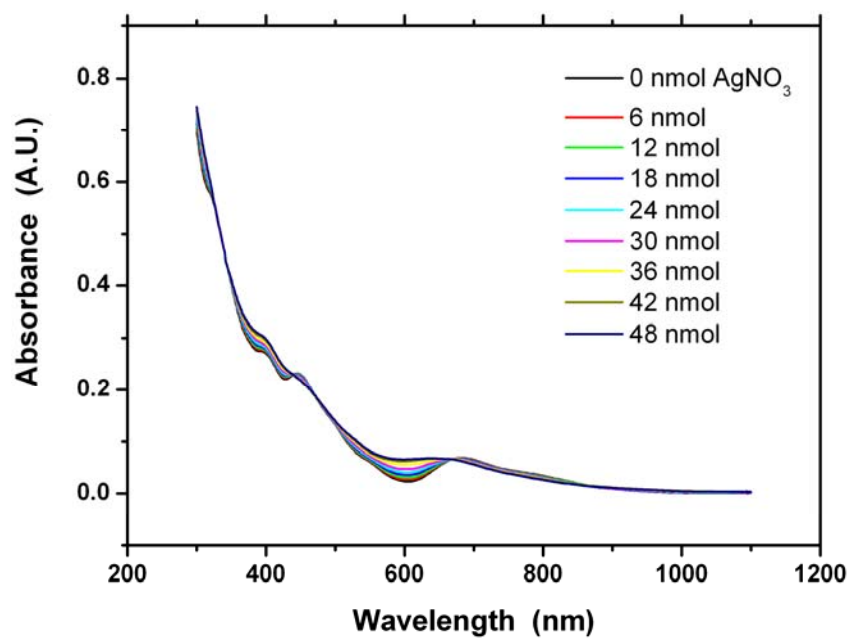

**Figure S-2.** Full-range (300 ~ 1100 nm) UV-Vis spectra of 46 nmole  $\text{Au}_{25}^-$  in  $\text{CH}_2\text{Cl}_2$  titrated by  $\text{Ag}^+$  (added as 10 mM  $\text{AgNO}_3$  in acetonitrile).

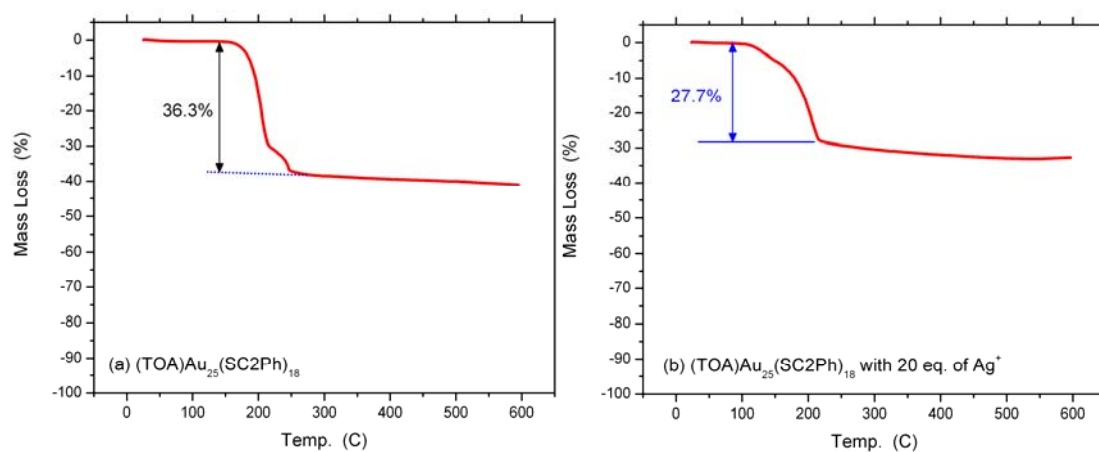

**Figure S-3.** Thermogravimetric analysis of (a)  $(\text{Oct}_4\text{N}^+)[\text{Au}_{25}(\text{SC}_2\text{Ph})_{18}^-]$  and (b) after reaction with 20 equivalents of  $\text{Ag}^+$ .

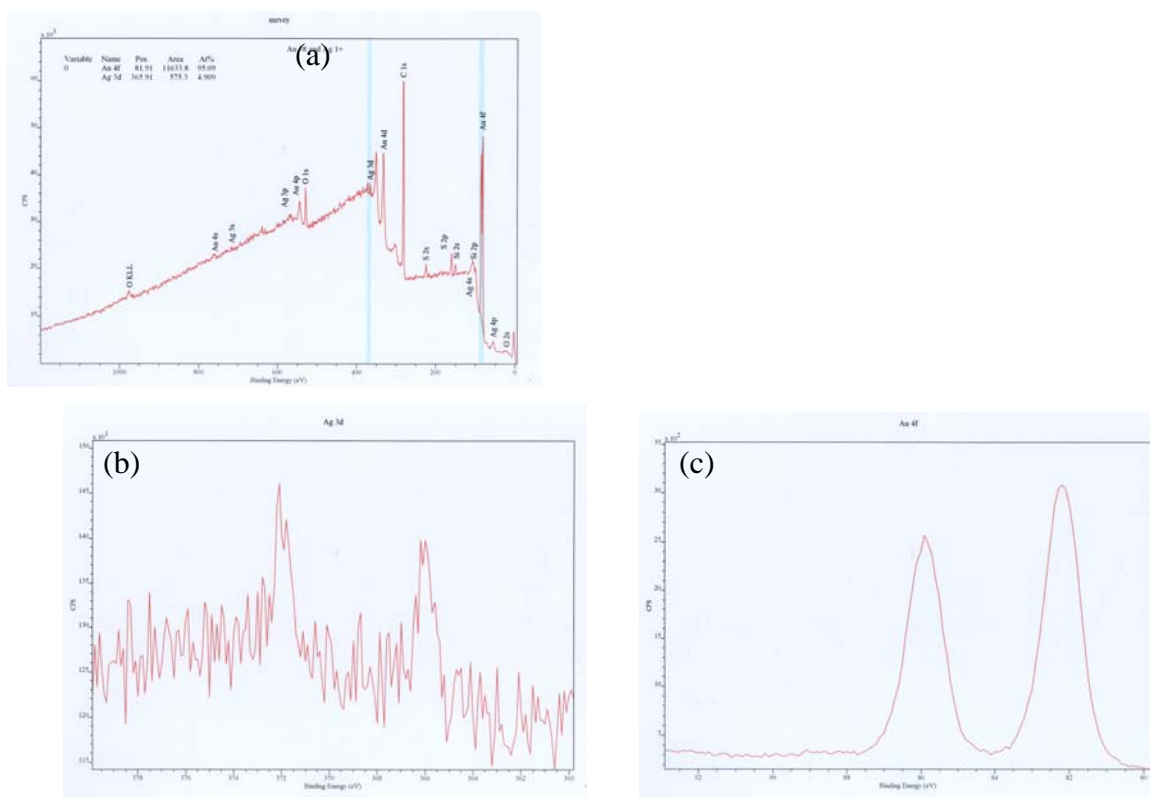

**Figure S-4.** X-ray photoelectron spectra of the  $\text{Au}_{25}^-$  nanoparticles after reaction with 20 equivalents of  $\text{Ag}^+$ . After the reaction, the solvent was removed and the sample was washed with methanol to get rid of  $\text{AgNO}_3$  residues. (a) survey scan, (b) 3d-Ag, and (c) 4f-Au.

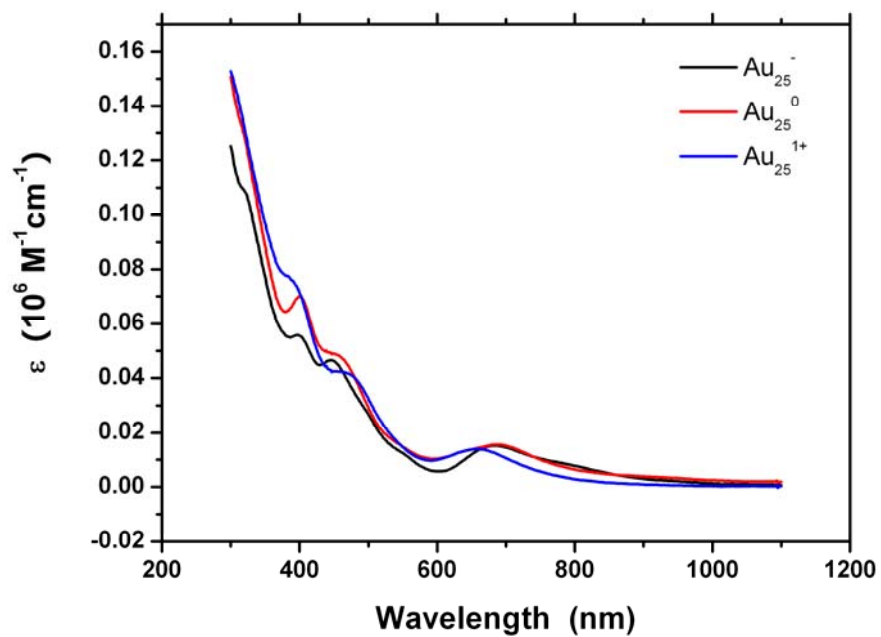

**Figure S-5.** UV-vis absorption spectra of  $\text{Au}_{25}^-$ ,  $\text{Au}_{25}^0$ , and  $\text{Au}_{25}^{1+}$ .  $\text{Au}_{25}^0$  and  $\text{Au}_{25}^{1+}$  were prepared by chemically oxidizing  $\text{Au}_{25}^-$  with an aqueous  $\text{Ce}(\text{SO}_4)_2$  solution. The charge states of  $\text{Au}_{25}$  were estimated by measuring the rest potentials ( $E_{\text{REST}}$ ) of the oxidized  $\text{Au}_{25}$  solution, in reference to voltammetrically assessed formal potentials.

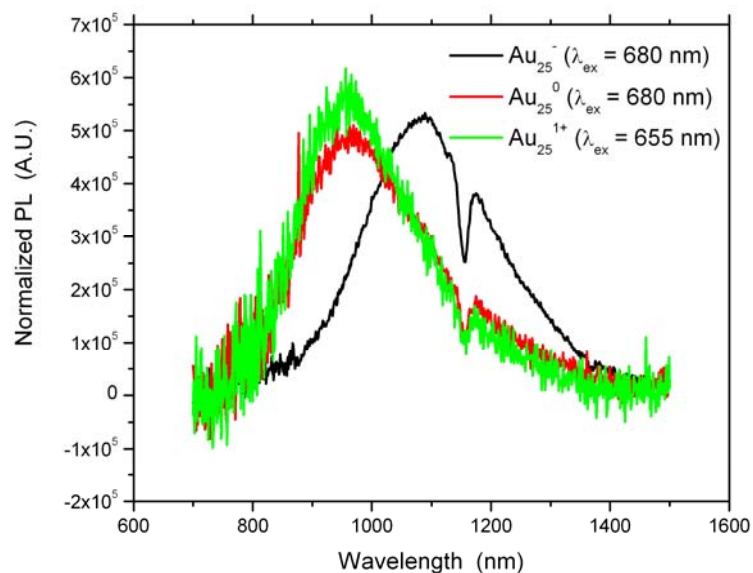

**Figure S-6.** Photoluminescence spectra of Au<sub>25</sub><sup>-</sup>, Au<sub>25</sub><sup>0</sup>, and Au<sub>25</sub><sup>1+</sup>. Au<sub>25</sub><sup>0</sup> and Au<sub>25</sub><sup>1+</sup> were prepared by chemically oxidizing Au<sub>25</sub><sup>-</sup> with an aqueous Ce(SO<sub>4</sub>)<sub>2</sub> solution. The charge states of Au<sub>25</sub> were estimated by measuring the rest potentials ( $E_{\text{REST}}$ ) of the oxidized Au<sub>25</sub> solution.

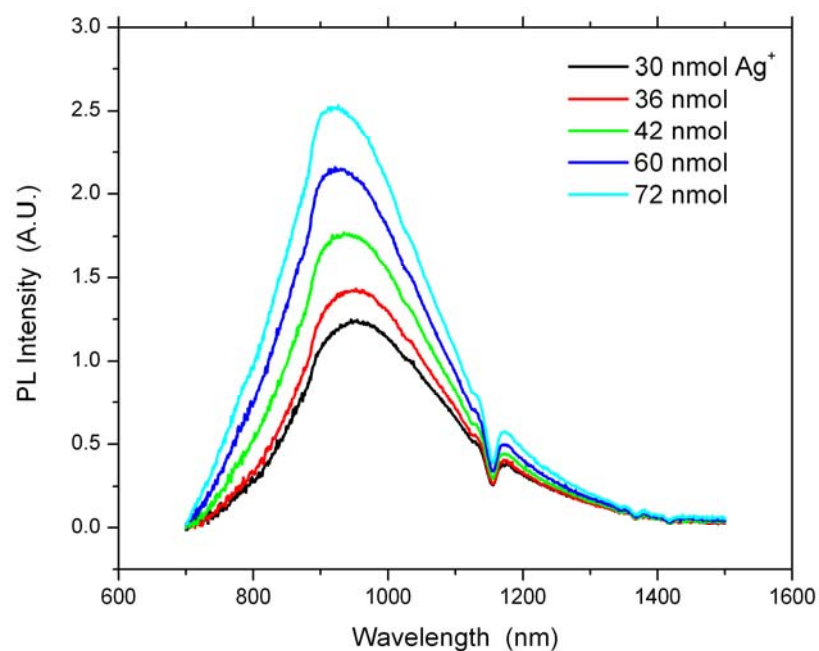

**Figure S-7.** Photoluminescence spectra of  $\text{Au}_{25}^-$  titrated by  $\text{Ag}^+$ .  $\lambda_{\text{EX}} = 400$  nm. 32.4 nmole  $\text{Au}_{25}^-$  MPCs in  $\text{CH}_2\text{Cl}_2$  titrated with 30 ~ 72 nmole  $\text{Ag}^+$ . Additions of smaller equivalents of  $\text{Ag}^+$  are shown in the manuscript figure.

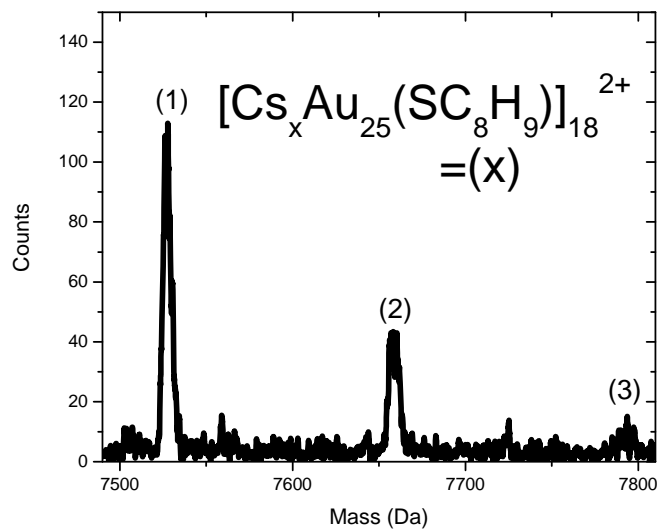

**Figure S-8.** Electrospray ionization (ESI) – TOF mass spectrum of  $\text{Au}_{25}^-$  obtained with 2.6 mg CsOAc (OAc = acetate) per mg MPCs in 70:30 methanol: $\text{CH}_2\text{Cl}_2$ . The numbers in parentheses represents the number of bound  $\text{Cs}^+$  ions.



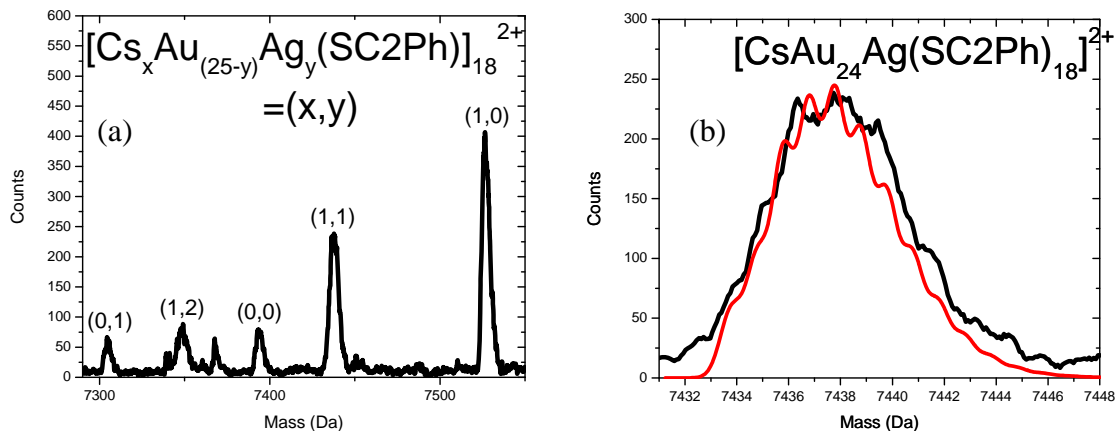

**Figure S-9.** (a) Electrospray ionization (ESI) – TOF mass spectrum of Au<sub>25</sub> with 1.5 equivalents of Ag<sup>+</sup>. 2.6 mg of CsOAc (OAc = acetate) per mg MPC was added to 70:30 methanol:CH<sub>2</sub>Cl<sub>2</sub> to obtain the spectra. The numbers in parentheses correspond to  $x$  and  $y$  of MPC formula. (b) High-resolution analysis of  $[\text{CsAu}_{24}\text{Ag}(\text{SC}_2\text{Ph})]^{2+}$ ; the red line is simulation. The sample was washed with MeOH to remove excess AgNO<sub>3</sub>. Sample was run through ESI in a solution of 70:30 v:v methanol:CH<sub>2</sub>Cl<sub>2</sub>.

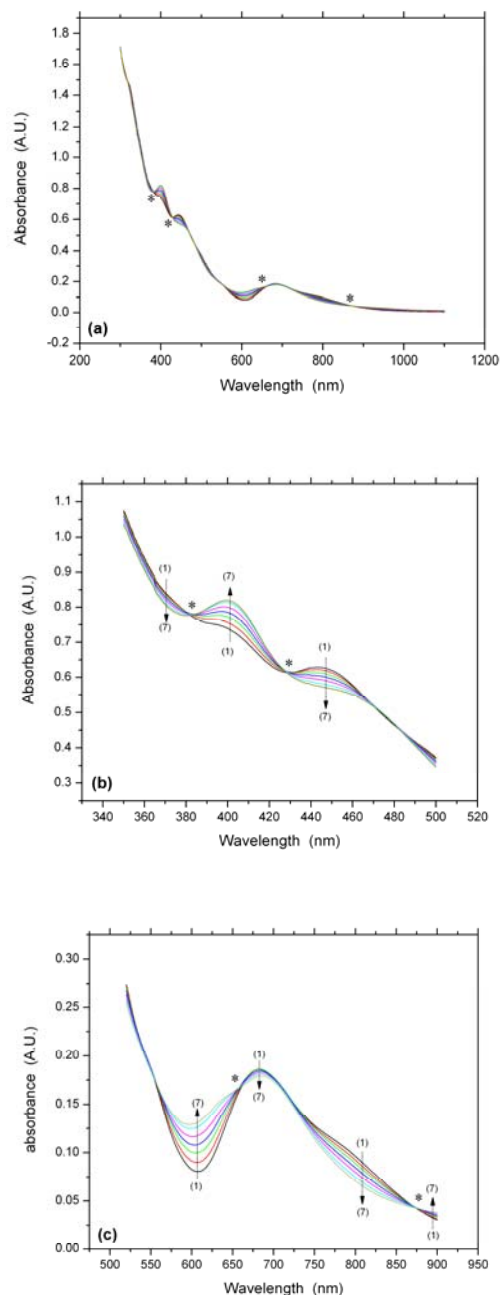

Figure S-10. UV-Vis absorption spectra of 29  $\mu\text{M}$   $\text{Au}_{25}$  MPCs in  $\text{CH}_2\text{Cl}_2$  in the presence of  $\text{Cu}^{2+}$ , whose added concentrations are (1) 0  $\mu\text{M}$ , (2) 2.3  $\mu\text{M}$ , (3) 4.5  $\mu\text{M}$ , (4) 6.8  $\mu\text{M}$ , (5) 9.1  $\mu\text{M}$ , (6) 11.3  $\mu\text{M}$ , and (7) 13.6  $\mu\text{M}$ . Isosbestic points are denoted as \* at 383, 430, 660, and 875 nm.  $\text{Cu}^{2+}$  was added as small volumes of 6.8 mM  $\text{CuCl}_2$  in  $\text{CH}_3\text{CN}$ .

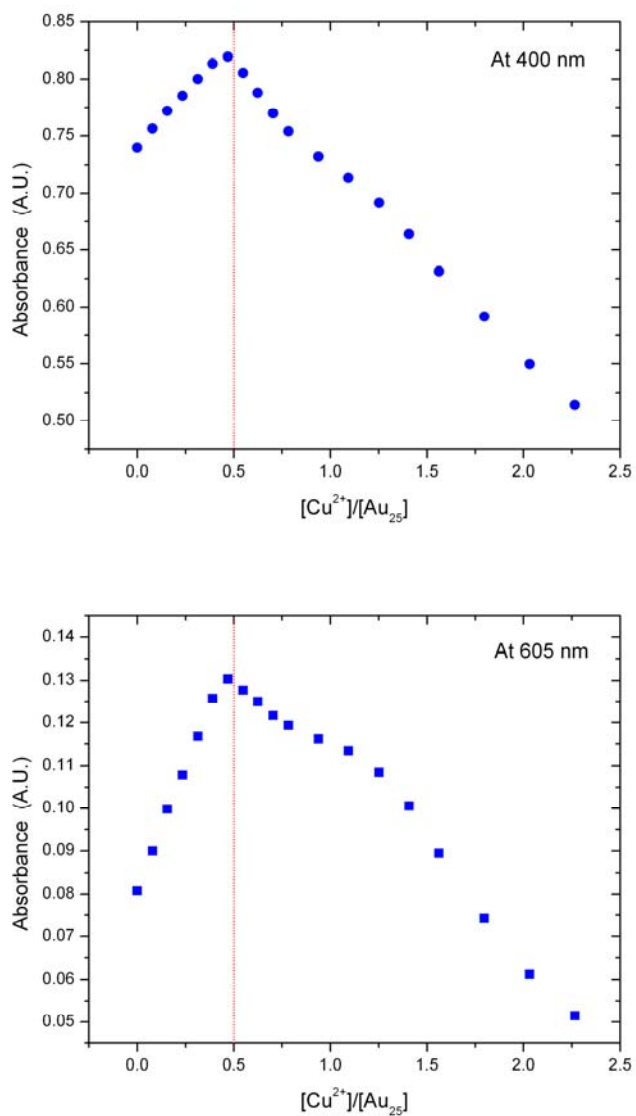

Figure S-11.  $\text{Cu}^{2+}$  titration plots of concentration ratio vs. absorbance at 400 nm and 605 nm. The initial concentration of  $\text{Au}_{25}$  MPCs in  $\text{CH}_2\text{Cl}_2$  was 29  $\mu\text{M}$ , and a 6.8 mM  $\text{CuCl}_2$  stock solution prepared in  $\text{CH}_3\text{CN}$  was used for titration.

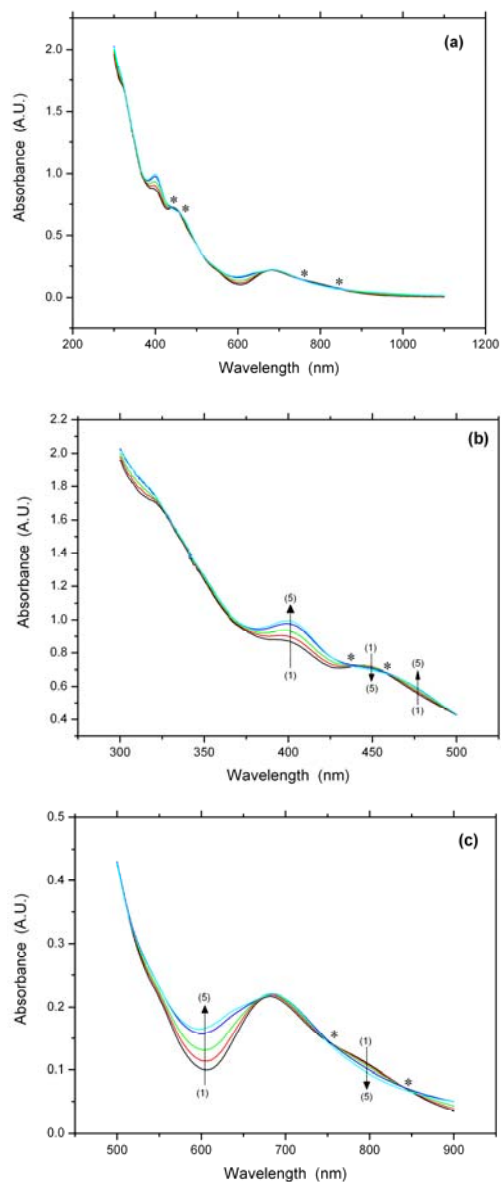

Figure S-12. UV-Vis absorption spectra of 32  $\mu\text{M}$   $\text{Au}_{25}$  MPCs in  $\text{CH}_2\text{Cl}_2$  in the presence of  $\text{Pb}^{2+}$ , whose concentrations are (1) 0  $\mu\text{M}$ , (2) 4  $\mu\text{M}$ , (3) 8  $\mu\text{M}$ , (4) 12  $\mu\text{M}$ , and (5) 16  $\mu\text{M}$ . Isosbestic points are denoted as \* at 438, 458, 755, and 843 nm. For the titration of  $\text{Pb}^{2+}$ , 6.0 mM  $\text{Pb}(\text{ClO}_4)_2 \cdot 3\text{H}_2\text{O}$  in  $\text{CH}_3\text{CN}$  was used.

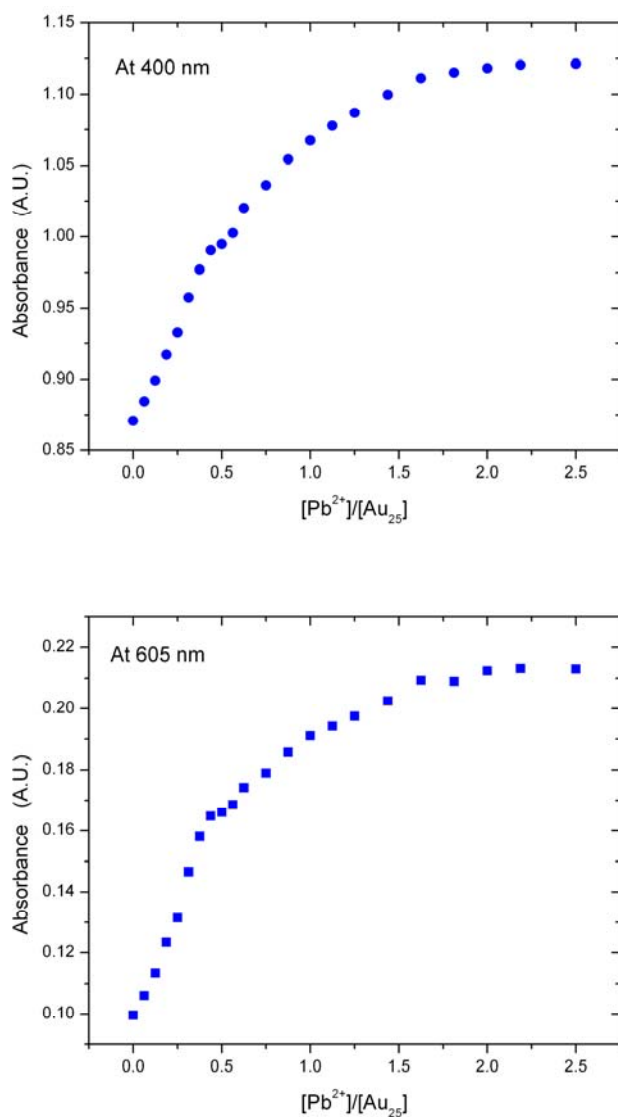

FigureS-13  $Pb^{2+}$  titration plots of concentration ratio vs. absorbance at 400 nm and 605 nm. The initial concentration of  $Au_{25}$  MPCs in  $CH_2Cl_2$  was  $32\ \mu M$ , and a  $6.0\ mM\ Pb(ClO_4)_2 \cdot 3H_2O$  stock solution prepared in  $CH_3CN$  was used for titration.

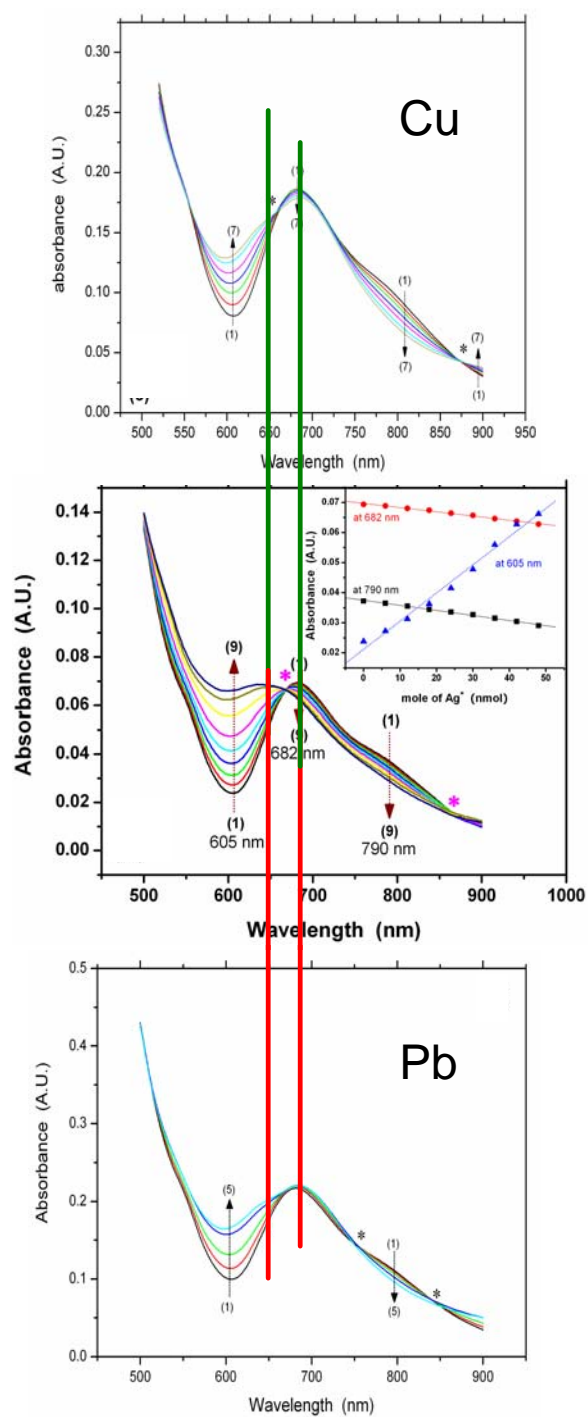

Figure S-14 Comparison of nanoparticle spectra produced by different metal ions. The vertical red bars guide the eye and show that spectra of solutions containing 1:1  $\text{Ag}^+$  and 0.5:1  $\text{Cu}^{2+}$  and  $\text{Pb}^{2+}$  / nanoparticle mole ratio are subtly different.
